# Supplementary material for: Evaluation of form birefringence in chiral nematic mesoporous materials
Source: Royal Society of Chemistry journal article supplement (doi:10.1039/c4tc00451e), 2014-01-01
Supplement: c4tc00451e4.pdf [file c4tc00451e4.pdf]

## Supporting Information for:

### Evaluation of form birefringence in chiral nematic mesoporous materials

Joel A. Kelly<sup>†</sup>, C. P. Kyle Manchee,<sup>§</sup> Susan Cheng,<sup>†</sup> Jun Myun Ahn,<sup>†</sup> Kevin E. Shopsowitz,<sup>†</sup> Wadood Y. Hamad<sup>‡</sup>, and Mark J. MacLachlan<sup>†\*</sup>

<sup>†</sup> Department of Chemistry, University of British Columbia, 2036 Main Mall, Vancouver, British Columbia, Canada V6T 1Z1

<sup>§</sup> Department of Physics, University of Toronto, 60 St. George St., Toronto, Ontario, Canada M5S 1A7

<sup>‡</sup> FPIInnovations, Inc., 3800 Wesbrook Mall, Vancouver, British Columbia, Canada V6S 2L9

\* Corresponding author: [mmaclach@chem.ubc.ca](mailto:mmaclach@chem.ubc.ca)

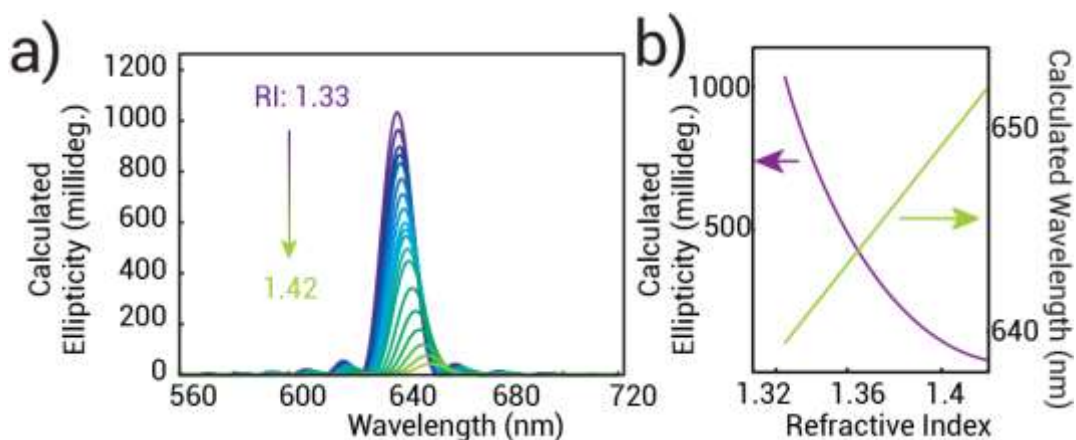

**Figure S1:** a) Calculated CD spectra for a chiral nematic mesoporous organosilica film based on the form birefringence model. b) Calculated response of the maximum intensity and wavelength as a function of the solution refractive index.

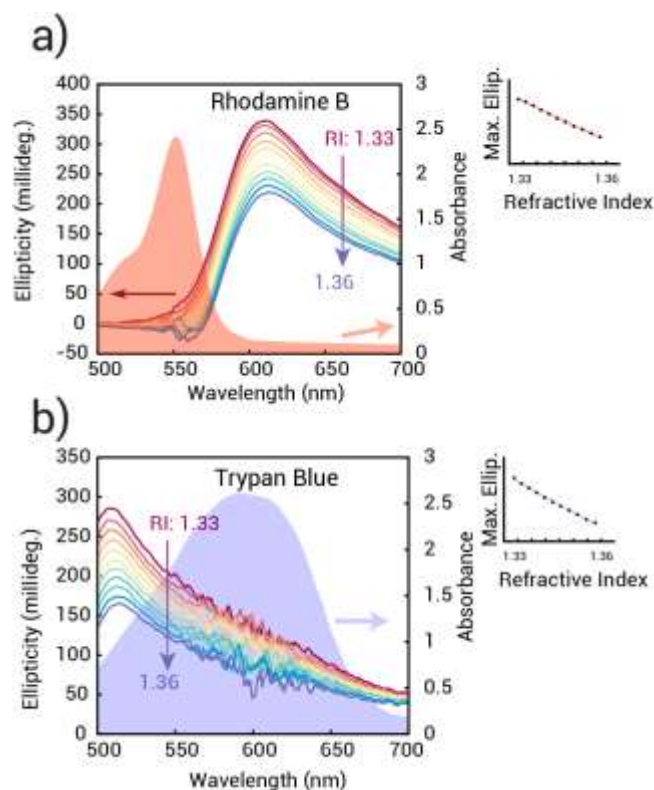

**Figure S2:** Refractometric sensing performance of chiral nematic mesoporous organosilica in opaque solutions spiked with Rhodamine B (a, absorption spectra shaded orange) and Trypan Blue (b, absorption spectra shaded blue). When the absorbance is greater than 2 (*i.e.*, 99% of the light absorbed by the dye), the signal/noise ratio of the circular dichroism feature decreases, but the wide breadth of the chiral nematic band ensures that the refractometric performance is retained.
